# Supplementary material
Source: HighWire-hosted journal article supplement (https://www.highwirestage.com/highwire/filestream/97331/field_highwire_adjunct_files/0/1144.pdf)
Supplement: 1144.pdf [file 1144.pdf]

**Supplemental Table 1. Radiologic measures as primary or secondary outcome parameters and/or as inclusion/exclusion criteria stated for currently published or ongoing clinical trials on cSDH embolization**

| Primary or Secondary Image-Based Study End Points <sup>a</sup> |                                                                                                                                                                                                                                                                                                                                                                                                                                                                                                                                                                                                                                                                                                                                                                                                                                                                                                                                                                                                                                                                                                                                                                                                                                                                                                                                                                                                                               |
|----------------------------------------------------------------|-------------------------------------------------------------------------------------------------------------------------------------------------------------------------------------------------------------------------------------------------------------------------------------------------------------------------------------------------------------------------------------------------------------------------------------------------------------------------------------------------------------------------------------------------------------------------------------------------------------------------------------------------------------------------------------------------------------------------------------------------------------------------------------------------------------------------------------------------------------------------------------------------------------------------------------------------------------------------------------------------------------------------------------------------------------------------------------------------------------------------------------------------------------------------------------------------------------------------------------------------------------------------------------------------------------------------------------------------------------------------------------------------------------------------------|
| cSDH size                                                      | <ul style="list-style-type: none"> <li>• cSDH width: change in size as maximum diameter/change in thickness</li> <li>• Change in hematoma thickness based on CT/MR imaging at 90 days postprocedure</li> <li>• Changes in hematoma volume at 90 days postprocedure</li> <li>• Change in size of SDH (time frame: 6 months)</li> <li>• Percentage volume change of recurrent hematoma (time frame: from date of recruitment until the date of first documented progression or date of death from any cause or at 6 months, whichever came first)</li> <li>• Change in size of subdural hematoma (time frame: compared preprocedure, 24 hours postprocedure, 7–10 days, 30 days, and 90 days postprocedure)</li> <li>• cSDH volume: volume reduction (time frame: 180 days postprocedure)</li> <li>• Reduction of cSDH size at 90 days (time frame: 90 days)</li> <li>• Volume reduction of cSDH in follow-up imaging (CT/MR imaging) 60 days after embolization</li> <li>• Changes in size of the SDH postprocedure (time frame: a head CT will be performed to assess the size of the SDH postprocedure. This will occur before the procedure, the day after the procedure, and at 2 and 6 weeks postprocedure.)</li> <li>• Change in hematoma volume in the experimental group vs the control group (time frame: at 90 days)</li> <li>• Hematoma volume reduction (time frame: 8, 16, and 24 weeks postdischarge)</li> </ul> |
| MLS                                                            | <ul style="list-style-type: none"> <li>• Change in MLS</li> </ul>                                                                                                                                                                                                                                                                                                                                                                                                                                                                                                                                                                                                                                                                                                                                                                                                                                                                                                                                                                                                                                                                                                                                                                                                                                                                                                                                                             |
| Radiographic resolution of SDH/evaluation of residual hematoma | <ul style="list-style-type: none"> <li>• Recurrent or refractory hematoma (radiographic resolution) as postprocedural change in size of the SDH compared with preprocedure size</li> <li>• Radiographic resolution of hematoma (time frame: 3, 6, and 12 month)</li> <li>• Number of patients with recurrent or refractory hematoma (radiographic resolution) (time frame: 24 hours after the procedure, 7–10 days, 30 days, and 90 days postprocedure to measure any change in size of the SDH compared with preprocedure size)</li> </ul>                                                                                                                                                                                                                                                                                                                                                                                                                                                                                                                                                                                                                                                                                                                                                                                                                                                                                   |
| Radiographic SDH recurrence/cSDH progression                   | <ul style="list-style-type: none"> <li>• Reappearance of homolateral SDH with MLS &gt; 5mm or presence of homolateral SDH &gt;10 mm in maximum thickness after 6 months</li> <li>• Reaccumulating or residual hematoma (hematoma thickness &gt; 10 mm)</li> <li>• Incidence of symptomatic SDH recurrence/progression within 90 days postprocedure</li> <li>• Hematoma recurrence/progression or requiring reintervention (time frame: 180 days postprocedure)</li> <li>• SDH recurrence (time frame: 3 months)</li> <li>• SDH recurrence (time frame: 6 months)</li> <li>• cSDH recurrence at 90 days (time frame: 90-days)</li> <li>• Incidence of cSDH progression or recurrence (time frame: 60 days)</li> <li>• Recurrence rate in the experimental group vs the control group (time frame: within 90 days)</li> </ul>                                                                                                                                                                                                                                                                                                                                                                                                                                                                                                                                                                                                   |

**Note:**—MMAE indicates MMA embolization.

<sup>a</sup>Definitions used in active MMAE.
